# Supplementary material
Source: PubMed Central journal article supplement (PMC6709462)
Supplement: AAC.00866-19-s0002.pdf [file AAC.00866-19-s0002.pdf]

| Supplemental Table 1: Analysis of Aztreonam Resistance Genes Identified from <i>in vitro</i> Selection in Clinical <i>P. aeruginosa</i> Isolate Pairs |                  |                            |                               |                                  |                                |                                              |            |                                                                       |
|-------------------------------------------------------------------------------------------------------------------------------------------------------|------------------|----------------------------|-------------------------------|----------------------------------|--------------------------------|----------------------------------------------|------------|-----------------------------------------------------------------------|
| Locus Name                                                                                                                                            | Common Gene name | No Exposure Group % (n=12) | Low Resistance Group % (n=12) | Medium Resistance Group % (n=25) | High Resistance Group % (n=11) | AZLI Isolates with Nonsyn Mutations % (n=48) | AZLI dN/dS | Significance of dN/dS Relative to No Exposure Group ( <i>p</i> value) |
| PA4110                                                                                                                                                | <i>ampC</i>      | 0.00                       | 0.00                          | 28.00                            | 63.64                          | 29.17                                        | UND*       | 6.20E-05                                                              |
| PA4418                                                                                                                                                | <i>ftsI</i>      | 8.33                       | 16.67                         | 48.00                            | 72.73                          | 45.83                                        | 11.67      | 9.68E-03                                                              |
| PA3831                                                                                                                                                | <i>pepA</i>      | 0.00                       | 8.33                          | 16.00                            | 18.18                          | 14.58                                        | 9.00       | 5.05E-02                                                              |
| PA5038                                                                                                                                                | <i>aroB</i>      | 0.00                       | 16.67                         | 0.00                             | 0.00                           | 4.17                                         | 0.33       | 1.59E-01                                                              |
| PA4020                                                                                                                                                | <i>mpl</i>       | 16.67                      | 25.00                         | 40.00                            | 36.36                          | 35.42                                        | UND        | 1.71E-01                                                              |
| PA2620                                                                                                                                                | <i>clpA</i>      | 8.33                       | 25.00                         | 16.00                            | 18.18                          | 18.75                                        | UND        | 3.13E-01                                                              |
| PA14_23460                                                                                                                                            | <i>orfN</i>      | 8.33                       | 0.00                          | 0.00                             | 0.00                           | 0.00                                         | UND        | 3.39E-01                                                              |
| PA3047                                                                                                                                                | <i>dacB</i>      | 8.33                       | 0.00                          | 4.00                             | 9.09                           | 4.17                                         | 2.00       | 5.02E-01                                                              |
| PA3721                                                                                                                                                | <i>nalC</i>      | 0.00                       | 8.33                          | 0.00                             | 0.00                           | 2.08                                         | 0.50       | 5.69E-01                                                              |
| PA5556                                                                                                                                                | <i>atpA</i>      | 8.33                       | 0.00                          | 8.00                             | 0.00                           | 4.17                                         | 1.50       | 5.84E-01                                                              |
| PA3574                                                                                                                                                | <i>nalD</i>      | 8.33                       | 8.33                          | 8.00                             | 0.00                           | 6.25                                         | 3.00       | 6.44E-01                                                              |
| PA3206                                                                                                                                                | -                | 8.33                       | 0.00                          | 12.00                            | 0.00                           | 6.25                                         | 3.00       | 6.60E-01                                                              |
| PA2492                                                                                                                                                | <i>mexT</i>      | 8.33                       | 8.33                          | 12.00                            | 18.18                          | 12.50                                        | UND        | 6.70E-01                                                              |
| PA0424                                                                                                                                                | <i>mexR</i>      | 8.33                       | 16.67                         | 12.00                            | 0.00                           | 10.42                                        | UND        | 8.28E-01                                                              |
| PA4732                                                                                                                                                | <i>pgi</i>       | 8.33                       | 0.00                          | 20.00                            | 27.27                          | 16.67                                        | 3.00       | 8.35E-01                                                              |
| PA2494                                                                                                                                                | <i>mexF</i>      | 25.00                      | 0.00                          | 28.00                            | 18.18                          | 18.75                                        | 12.00      | 1.00E+00                                                              |
| PA1180                                                                                                                                                | <i>phoQ</i>      | 0.00                       | 0.00                          | 4.00                             | 0.00                           | 2.08                                         | 1.00       | 1.00E+00                                                              |
| PA5554                                                                                                                                                | <i>atpD</i>      | 0.00                       | 0.00                          | 4.00                             | 0.00                           | 2.08                                         | 1.00       | 1.00E+00                                                              |
| PA2621                                                                                                                                                | <i>clpS</i>      | 0.00                       | 0.00                          | 0.00                             | 0.00                           | 0.00                                         | UND        | UND                                                                   |

\*UND= Undefined, due to an absence of synonymous mutations

**Supplemental Table 2: Genes enriched by Aztreonam Tn-Seq**

| Locus Name | Common Gene Name | Product                                                     | TnSeq Read Count (log2 scale) |               |               |               | Fold increase in Reads Relative to Control |               |               |
|------------|------------------|-------------------------------------------------------------|-------------------------------|---------------|---------------|---------------|--------------------------------------------|---------------|---------------|
|            |                  |                                                             | Control (Azt 0 µg/mL)         | Azt 1.0 µg/mL | Azt 2.0 µg/mL | Azt 4.0 µg/mL | Azt 1.0 µg/mL                              | Azt 2.0 µg/mL | Azt 4.0 µg/mL |
| PA0424     | <i>mexR</i>      | Multidrug resistance operon repressor MexR                  | 12.87                         | 20.93         | 21.60         | 22.26         | 1.63                                       | 1.68          | 1.73          |
| PA3574     | <i>nalD</i>      | NalD                                                        | 13.48                         | 22.16         | 22.47         | 21.87         | 1.64                                       | 1.67          | 1.62          |
| PA4522     | <i>ampD</i>      | Beta-lactamase expression regulator AmpD                    | 10.45                         | 16.00         | 13.20         | 10.67         | 1.53                                       | 1.26          | 1.02          |
| PA5203     | <i>gshA</i>      | Glutamate-cysteine ligase                                   | 6.82                          | 10.45         | 5.54          | 6.59          | 1.53                                       | 0.81          | 0.97          |
| PA2493     | <i>mexE</i>      | RND multidrug efflux membrane fusion protein MexE precursor | 6.72                          | 15.43         | 6.95          | 5.76          | 2.29                                       | 1.03          | 0.86          |
| PA3047     | <i>dacB</i>      | Probable D-alanyl-D-alanine carboxypeptidase                | 12.04                         | 19.17         | 12.07         | 9.94          | 1.59                                       | 1.00          | 0.82          |
| PA2494     | <i>mexF</i>      | RND multidrug efflux transporter MexF                       | 8.14                          | 16.69         | 10.84         | 6.59          | 2.05                                       | 1.33          | 0.81          |
| PA3831     | <i>pepA</i>      | Leucine aminopeptidase                                      | 11.74                         | 17.99         | 9.27          | 9.09          | 1.53                                       | 0.79          | 0.77          |
| PA3166     | <i>pheA</i>      | Chorismate mutase                                           | 5.40                          | 10.20         | 3.37          | 0.00          | 1.89                                       | 0.62          | 0.00          |
| PA2492     | <i>mexT</i>      | Transcriptional regulator MexT                              | 5.40                          | 9.65          | 2.37          | 0.00          | 1.79                                       | 0.44          | 0.00          |
| PA4525     | <i>pilA</i>      | Type 4 fimbrial precursor PilA                              | 7.21                          | 12.23         | 5.69          | 0.00          | 1.70                                       | 0.79          | 0.00          |
| PA4556     | <i>pilE</i>      | Type 4 fimbrial biogenesis protein PilE                     | 7.68                          | 12.09         | 3.37          | 0.00          | 1.58                                       | 0.44          | 0.00          |
